# Supplementary material for: The effect of SSRI/SNRI antidepressant treatment on the gut microbiota of patients with major depressive disorder
Source: Research Square preprint supplement (doi:10.21203/rs.3.rs-8249952/v1), 2026-01-22
Supplement: Supplementary file 1 [file 4dd3a9b34e38159e0724b1ee.xlsx]

## Sheet: eTable 1 Cov. correlations
eTable 1. Overview of the correlations between MDD diagnosis, SSRI/SNRI treatment and covariates. Associations with continuous covariates were tested using a logistic regression. Associations with dichotomous covariates werre tested using a Chi-square
MACS cohort
	Age		BMI		Sex		Sequencing depth		Sequencing batch		Collection site		# Psychiatric comorbidities		BDI score
	F	p	F	p	X2	p	F	p	X2	p	X2	p	X2	p	F	p
MDD Diagnosis	4.63	0.032	45.53	< 0.001	0.08	0.772	11.37	< 0.001	6.85	0.008873	29	< 0.001	-	-	945.5	< 0.001
SSRI/SNRI treatment	6.14	0.01	5.24	0.06	1.93	0.17	0.45	0.5	8.31	0	0	1	5.27	0.02	61.32	< 0.001
MIND-Set cohort
	Age		BMI		Sex		Sequencing depth		# Psychiatric comorbidities		IDS score
	F	p	F	p	X2	p	F	p	F	p	F	p
MDD Diagnosis	2.05	0.154	4.49	0.035	0.06	0.804	2.45	0.119	441	< 0.001	321.1	< 0.001
SSRI/SNRI treatment	8.1	< 0.001	4.01	0.008	2.02	0.568	0.56	0.455	0.74	0.393	14.68	< 0.001
Abbreviations: BDI: Beck Depression Inventory; BMI: Body Mass Index; IDS: Inventory of Depressive Symptomatology; SNRI: Serotonin-Norepinephrine Reuptake Inhibitor; SSRI: Selective Serotonin Reuptake Inhibitor

## Sheet: eTable 2 Alpha diversity (MACS)
eTable 2. Overview of the associations between MDD diagnosis (case-control), SSRI/SNRI treatment and alpha diversity. The presented statistics are derived from logistic regression
Case-control comparison All models were adjusted for age, sex, BMI, collection site, sequencing depth, and sequencing batch.
Alpha index	n	Log OR	Lower CI	Upper CI	p	padj
Simpson evenness	1568	-0.014	-0.123	0.095	0.803	0.942
Pielou's Index	1568	-0.062	-0.172	0.049	0.273	0.705
Observed diversity	1568	-0.073	-0.182	0.037	0.194	0.705
Medication comparison (SSRI/SNRI) All models were adjusted for age, sex, BMI, psychiatric comorbidity, collection site, sequencing depth, sequencing batch, and BDI score.
Alpha index	n	Log OR	Lower CI	Upper CI	p	padj
Simpson evenness	656	-0.006	-0.176	0.164	0.942	0.942
Pielou's Index	656	0.082	-0.09	0.253	0.353	0.705
Observed diversity	656	0.02	-0.151	0.191	0.82	0.942

## Sheet: eTable 3 Beta diversity
eTable 3. Overview of the associations between MDD diagnosis (case-control), SSRI/SNRI treatment and beta diversity. The presented statistics are derived from a PERMANOVA model on the Aitchison's distance matrix
	Unaffected control vs. all MDD, n = 1568
	The model was adjusted for age, sex, BMI, collection site, sequencing depth, and sequencing batch.
		ASV level
		SS	R2	F	p
	Diagnosis	2736	0.001	1.66	0.01 **
	Age	8428	0.003	5.114	0.001 **
	Sex	3458	0.001	2.098	0.002 **
	BMI	6190	0.002	3.756	0.001 **
	Read depth	13492	0.005	8.186	0.001 **
	Site	3205	0.001	1.945	0.004 **
	Sequencing batch	197366	0.068	119.757	0.001 **
	Residual	2570964	0.888		-
	Total	2.89547e+06	1	-	-
	* Significant at p < 0.05
	** Significant at p < 0.01
	Unmedicated vs. medicated MDD patients (MACS), n = 656						Unmedicated vs. medicated MDD patients (MIND-Set), n = 109
	The model was adjusted for age, sex, BMI, psychiatric comorbidity, collection site, sequencing depth, sequencing batch, and BDI score.						The model was adjusted for age, sex, BMI, # of psychiatric comorbidity, sequencing depth, and IDS score.
		ASV level						ASV level
		SS	R2	F	p			SS	R2	F	p
	Medication use	1800	0.002	1.077	0.232		Medication use	13498	0.012	1.029	0.306
	Age	4470	0.004	2.674	0.001 **		Age	10072	0.009	1.535	0.004 **
	Sex	2516	0.002	1.505	0.008 **		Sex	7415	0.007	1.13	0.146
	BMI	4122	0.003	2.466	0.001 **		BMI	6340	0.006	0.966	0.47
	Psychiatric comorbidity	1810	0.002	1.083	0.227		Read depth	8103	0.007	1.235	0.064
	Sequencing depth	7472	0.006	4.47	0.001 **		Symptom severity	11023	0.01	1.68	0.003 **
	Collection site	1999	0.002	1.196	0.098		# psychiatric comorbidity	7268	0.007	1.108	0.165
	Sequencing batch	62448	0.052	37.361	0.001 **		Residual	1036590	0.94	-	-
	Symptom severity	1958	0.002	1.172	0.121		Total	1103088	1	-	-
	Residual	1079777	1		-		* Significant at p < 0.05
	Total	1.19739e+06	1	-	-		** Significant at p < 0.01
	* Significant at p < 0.05
	** Significant at p < 0.01

## Sheet: eTable 4 Prevalence
eTable 4. The prevalence (% samples with count >0) of the 9 MDD-associated genera in unaffected controls, MDD patients and each medication-stratified group for MACS and MIND-Set
	MACS							MIND-Set
Genus	All	Unaffected control		MDD				All	Unaffected control		MDD
				All	Unmedicated	SSRI/SNRI±					All	Unmedicated	SSRI/SNRI±
Clostridium sensu stricto 1	0.7885	0.8237		0.745	0.7829	0.6903		0.948	0.9617		0.9367	0.948	0.948
Lachnospiraceae FCS020 group	0.7388	0.7818		0.6922	0.7138	0.679		0.9653	0.9727		0.9593	0.9653	0.9653
Intestinimonas	0.6878	0.6794		0.6975	0.6875	0.7159		0.9158	0.8907		0.9367	0.9158	0.9158
Eggerthella	0.574	0.5376		0.6116	0.6086	0.5994		0.7376	0.7322		0.7421	0.7376	0.7376
Anaerotruncus	0.4691	0.4353		0.5165	0.4704	0.5682		0.8787	0.8689		0.8869	0.8787	0.8787
Clostridium innocuum group	0.3499	0.2959		0.4055	0.4013	0.4176		0.6436	0.5519		0.7195	0.6436	0.6436
Hungatella	0.2756	0.2256		0.321	0.2895	0.3494		0.4629	0.3552		0.552	0.4629	0.4629
Faecalitalea	0.2349	0.2072		0.2642	0.2105	0.2983		0.3639	0.3607		0.3665	0.3639	0.3639
GCA900066755	0.1019	0.0838		0.1149	0.1118	0.1278		0.4274	0.4274		0.4491	0.4274	0.4274

## Sheet: eTable 5 MACS case-control
eTable 5. Overview of the associations between MDD diagnosis (case-control) and genus abundace. The presented statistics are derived from a logistic (left) and quantile (right) regression in the MACS cohort
Genus		Logistic regression All models were adjusted for age, gender, BMI, collection site, sequencing depth, and sequencing batch.									Quantile regression All models were adjusted for age, gender, BMI, collection site, sequencing depth, and sequencing batch.
	n	Log OR	Lower CI	Upper CI	z	se	p	padj		n	Effect size	Lower CI	Upper CI	t	se	p	padj
Eggerthella	1568	0.257	0.151	0.362	4.771	0.0538671	< .001	0		1568	0.32	0.121	0.518	3.155	0.101	< .001	0.044
Hungatella	1568	0.271	0.159	0.383	4.742	0.0571489	< .001	0		1568	0.109	0.054	0.164	3.913	0.028	< .001	0.009
Anaerotruncus	1568	0.234	0.129	0.34	4.356	0.053719	< .001	0.001		1568	0.124	0.044	0.205	3.021	0.041	0.003	0.049
[Clostridium] innocuum group	1568	0.238	0.13	0.346	4.328	0.0549908	< .001	0.001		1568	0.135	0.061	0.21	3.547	0.038	< .001	0.015
Lachnospiraceae FCS020 group	1568	-0.22	-0.324	-0.115	-4.124	0.0533463	< .001	0.001		1568	-0.263	-0.408	-0.119	-3.576	0.074	< .001	0.015
Clostridium sensu stricto 1	1568	-0.215	-0.319	-0.11	-4.037	0.0532574	< .001	0.002		1568	-0.44	-0.712	-0.169	-3.18	0.138	0.002	0.044
Erysipelatoclostridium	1568	0.2	0.095	0.305	3.746	0.0533903	< .001	0.004		1568	0.321	0.097	0.545	2.809	0.114	0.005	0.063
Coprobacillus	1568	0.212	0.101	0.323	3.736	0.0567452	< .001	0.004		1568	0.045	0.006	0.085	2.248	0.02	0.025	0.137
Faecalibacterium	1568	-0.197	-0.306	-0.088	-3.547	0.0555399	< .001	0.008		1568	-0.13	-0.244	-0.016	-2.235	0.058	0.026	0.137
Subdoligranulum	1568	-0.182	-0.286	-0.077	-3.416	0.0532787	0.001	0.012		1568	-0.143	-0.287	0.001	-1.944	0.074	0.052	0.204
uncultured organism	1568	0.177	0.071	0.283	3.267	0.0541781	0.001	0.019		1568	0.045	0.007	0.083	2.333	0.019	0.02	0.12
Faecalitalea	1568	0.171	0.066	0.277	3.182	0.0537398	0.001	0.023		1568	0.067	0.022	0.113	2.931	0.023	0.003	0.049
[Eubacterium] fissicatena group	1568	0.163	0.059	0.266	3.068	0.0531291	0.002	0.031		1568	0.051	-0.008	0.11	1.705	0.03	0.088	0.248
Intestinimonas	1568	0.162	0.056	0.268	2.995	0.0540902	0.003	0.033		1568	0.367	0.176	0.558	3.765	0.097	0	0.011
UBA1819	1568	0.159	0.055	0.263	2.99	0.0531773	0.003	0.033		1568	0.184	0.019	0.348	2.193	0.084	0.028	0.137
[Ruminococcus] gnavus group	1568	0.16	0.055	0.266	2.973	0.0538177	0.003	0.033		1568	0.128	-0.026	0.281	1.63	0.078	0.103	0.266
GCA-900066755	1568	0.167	0.057	0.277	2.969	0.0562479	0.003	0.033		1568	0.054	0.019	0.088	3.06	0.018	0.002	0.049
Lachnospiraceae ND3007 group	1568	-0.15	-0.253	-0.046	-2.843	0.0527612	0.004	0.046		1568	-0.185	-0.388	0.019	-1.781	0.104	0.075	0.232
Candidatus Soleaferrea	1568	0.15	0.046	0.254	2.83	0.0530035	0.005	0.046		1568	0.047	-0.016	0.111	1.47	0.032	0.142	0.306
Flavonifractor	1568	0.151	0.045	0.257	2.786	0.0541996	0.005	0.05		1568	0.211	0.012	0.41	2.081	0.102	0.038	0.161
Eisenbergiella	1568	0.144	0.041	0.248	2.726	0.0528247	0.006	0.055		1568	0.206	0.034	0.378	2.344	0.088	0.019	0.12
Actinomyces	1568	0.146	0.041	0.251	2.725	0.053578	0.006	0.055		1568	0.163	0.04	0.286	2.59	0.063	0.01	0.09
metagenome	1568	0.146	0.036	0.256	2.605	0.0560461	0.009	0.075		1568	0.037	0.003	0.072	2.174	0.017	0.03	0.137
Erysipelotrichaceae UCG-003	1568	-0.131	-0.234	-0.027	-2.479	0.0528439	0.013	0.103		1568	-0.108	-0.304	0.089	-1.077	0.1	0.282	0.464
Sellimonas	1568	0.13	0.026	0.233	2.462	0.0528026	0.014	0.104		1568	0.08	0.016	0.145	2.454	0.033	0.014	0.096
Lachnoclostridium	1568	0.133	0.024	0.241	2.402	0.0553705	0.016	0.114		1568	0.182	0.042	0.322	2.557	0.071	0.011	0.09
Lachnospiraceae NK4A136 group	1568	-0.127	-0.231	-0.023	-2.401	0.0528946	0.016	0.114		1568	-0.123	-0.322	0.077	-1.206	0.102	0.228	0.401
Oscillibacter	1568	0.127	0.022	0.232	2.366	0.0536771	0.018	0.121		1568	0.119	-0.059	0.297	1.31	0.091	0.19	0.358
uncultured bacterium	1568	0.125	0.02	0.23	2.335	0.0535332	0.02	0.123		1568	0.06	0.014	0.106	2.54	0.024	0.011	0.09
[Eubacterium] ruminantium group	1568	-0.124	-0.228	-0.02	-2.334	0.0531277	0.02	0.123		1568	-0.028	-0.103	0.047	-0.738	0.038	0.461	0.637
Solobacterium	1568	0.126	0.019	0.233	2.304	0.0546875	0.021	0.128		1568	0.057	0.013	0.1	2.553	0.022	0.011	0.09
uncultured bacterium	1568	0.124	0.017	0.23	2.278	0.0544337	0.023	0.128		1568	0.056	0.015	0.097	2.651	0.021	0.008	0.085
Agathobacter	1568	-0.121	-0.226	-0.017	-2.273	0.0532336	0.023	0.128		1568	-0.269	-0.478	-0.059	-2.517	0.107	0.012	0.09
Gordonibacter	1568	0.12	0.016	0.223	2.271	0.0528402	0.023	0.128		1568	0.107	-0.008	0.221	1.829	0.058	0.068	0.224
Roseburia	1568	-0.12	-0.224	-0.015	-2.243	0.0534998	0.025	0.131		1568	-0.093	-0.213	0.028	-1.506	0.062	0.132	0.303
Coprococcus	1568	-0.118	-0.221	-0.015	-2.238	0.0527256	0.025	0.131		1568	-0.13	-0.26	0	-1.963	0.066	0.05	0.199
Catabacter	1568	0.12	0.014	0.225	2.229	0.0538358	0.026	0.131		1568	0.045	0.005	0.084	2.129	0.02	0.033	0.146
uncultured bacterium	1568	0.118	0.013	0.224	2.208	0.053442	0.027	0.131		1568	0.04	0.004	0.076	2.178	0.018	0.03	0.137
Lachnospira	1568	-0.117	-0.222	-0.012	-2.193	0.0533516	0.028	0.131		1568	-0.165	-0.313	-0.017	-2.19	0.075	0.029	0.137
NK4A214 group	1568	-0.117	-0.222	-0.012	-2.192	0.0533759	0.028	0.131		1568	-0.436	-0.722	-0.15	-2.988	0.146	0.003	0.049
Romboutsia	1568	-0.117	-0.221	-0.012	-2.188	0.0534735	0.029	0.131		1568	-0.012	-0.052	0.028	-0.569	0.02	0.57	0.695
Corynebacterium	1568	0.118	0.012	0.224	2.18	0.0541284	0.029	0.131		1568	0.079	0.026	0.133	2.916	0.027	0.004	0.049
Fenollaria massiliensis	1568	0.123	0.012	0.233	2.169	0.0567082	0.03	0.132		1568	0.023	-0.014	0.061	1.221	0.019	0.222	0.401
UCG-009	1568	0.111	0.009	0.214	2.126	0.0522107	0.034	0.143		1568	0.107	0.026	0.188	2.589	0.041	0.01	0.09
Parasutterella	1568	0.112	0.008	0.216	2.11	0.0530806	0.035	0.146		1568	0.319	-0.021	0.658	1.842	0.173	0.066	0.224
[Eubacterium] ventriosum group	1568	-0.109	-0.213	-0.006	-2.064	0.0528101	0.039	0.159		1568	-0.2	-0.369	-0.031	-2.326	0.086	0.02	0.12
Incertae Sedis	1568	0.108	0.003	0.213	2.024	0.0533597	0.043	0.172		1568	0.081	-0.054	0.216	1.17	0.069	0.242	0.413
Paludicola	1568	0.106	0.003	0.21	2.014	0.0526316	0.044	0.172		1568	0.044	-0.027	0.115	1.228	0.036	0.22	0.401
Prevotella	1568	-0.106	-0.211	-0.002	-1.994	0.0531595	0.046	0.176		1568	-0.402	-0.744	-0.061	-2.31	0.174	0.021	0.12
Paraprevotella	1568	-0.104	-0.208	-0.001	-1.975	0.0526582	0.048	0.176		1568	0.022	-0.033	0.076	0.787	0.028	0.431	0.624
Dorea	1568	-0.106	-0.211	-0.001	-1.973	0.0537253	0.048	0.176		1568	-0.091	-0.219	0.037	-1.399	0.065	0.162	0.334
Lactococcus	1568	-0.103	-0.206	-0.001	-1.97	0.0522843	0.049	0.176		1568	-0.18	-0.359	-0.001	-1.974	0.091	0.049	0.198
Ruminococcus	1568	-0.1	-0.203	0.003	-1.898	0.052687	0.058	0.198		1568	-0.179	-0.378	0.021	-1.756	0.102	0.079	0.24
Megasphaera	1568	0.102	-0.003	0.208	1.898	0.0537408	0.058	0.198		1568	0.042	0.005	0.079	2.205	0.019	0.028	0.137
human gut metagenome	1568	-0.1	-0.203	0.003	-1.897	0.0527148	0.058	0.198		1568	-0.018	-0.069	0.033	-0.691	0.026	0.49	0.653
Veillonella	1568	-0.101	-0.206	0.004	-1.88	0.0537234	0.06	0.202		1568	-0.17	-0.365	0.025	-1.708	0.1	0.088	0.248
CAG-352	1568	0.099	-0.005	0.204	1.863	0.0531401	0.063	0.206		1568	0.031	-0.006	0.069	1.639	0.019	0.101	0.266
uncultured Ruminococcaceae bacterium	1568	-0.1	-0.207	0.006	-1.847	0.0541419	0.065	0.209		1568	0.003	-0.033	0.04	0.181	0.019	0.857	0.915
Haemophilus	1568	-0.098	-0.201	0.006	-1.842	0.053203	0.065	0.209		1568	-0.396	-0.658	-0.134	-2.967	0.133	0.003	0.049
[Ruminococcus] torques group	1568	0.097	-0.008	0.202	1.805	0.0537396	0.071	0.222		1568	0.143	0.003	0.282	2.001	0.071	0.046	0.19
Frisingicoccus	1568	0.093	-0.01	0.196	1.773	0.0524535	0.076	0.235		1568	0.03	-0.008	0.068	1.526	0.019	0.127	0.299
Anaerofilum	1568	0.091	-0.011	0.194	1.75	0.052	0.08	0.24		1568	0.053	-0.004	0.111	1.811	0.029	0.07	0.224
CAG-56	1568	-0.091	-0.194	0.011	-1.749	0.0520297	0.08	0.24		1568	-0.473	-0.706	-0.24	-3.982	0.119	< 0.001	0.009
Rothia	1568	0.093	-0.012	0.199	1.733	0.0536642	0.083	0.243		1568	0.069	0.018	0.119	2.664	0.026	0.008	0.085
Granulicatella	1568	0.093	-0.013	0.198	1.723	0.0539756	0.085	0.243		1568	0.081	0.026	0.135	2.914	0.028	0.004	0.049
uncultured Firmicutes bacterium	1568	0.095	-0.013	0.203	1.721	0.0552005	0.085	0.243		1568	0.031	-0.002	0.063	1.858	0.017	0.063	0.221
uncultured	1568	0.091	-0.018	0.199	1.639	0.0555217	0.101	0.284		1568	0.069	-0.023	0.16	1.47	0.047	0.142	0.306
Lachnospiraceae UCG-001	1568	-0.085	-0.188	0.019	-1.602	0.0530587	0.109	0.302		1568	-0.144	-0.341	0.053	-1.435	0.1	0.151	0.316
[Eubacterium] brachy group	1568	0.085	-0.019	0.189	1.595	0.0532915	0.111	0.302		1568	0.044	-0.012	0.1	1.53	0.029	0.126	0.299
[Eubacterium] xylanophilum group	1568	-0.083	-0.187	0.021	-1.561	0.053171	0.118	0.318		1568	-0.202	-0.494	0.09	-1.357	0.149	0.175	0.347
Lactobacillus	1568	0.083	-0.023	0.189	1.531	0.0542129	0.126	0.33		1568	0.185	-0.023	0.393	1.749	0.106	0.081	0.24
Barnesiella	1568	-0.08	-0.184	0.023	-1.522	0.0525624	0.128	0.33		1568	-0.068	-0.345	0.209	-0.481	0.141	0.631	0.75
Bacteroides	1568	0.085	-0.025	0.194	1.521	0.0558843	0.128	0.33		1568	0.054	-0.034	0.142	1.21	0.045	0.226	0.401
Akkermansia	1568	0.082	-0.024	0.188	1.515	0.0541254	0.13	0.33		1568	0.028	-0.013	0.068	1.332	0.021	0.183	0.351
Citrobacter	1568	-0.079	-0.182	0.024	-1.508	0.0523873	0.132	0.33		1568	0.003	-0.038	0.045	0.151	0.021	0.88	0.93
Odoribacter	1568	0.079	-0.025	0.183	1.485	0.0531987	0.137	0.34		1568	0.137	-0.018	0.293	1.732	0.079	0.084	0.245
Christensenellaceae R-7 group	1568	-0.079	-0.184	0.026	-1.469	0.0537781	0.142	0.346		1568	-0.111	-0.346	0.125	-0.922	0.12	0.357	0.554
Papillibacter	1568	0.079	-0.027	0.186	1.462	0.0540356	0.144	0.346		1568	0.041	0.006	0.075	2.313	0.018	0.021	0.12
UCG-002	1568	-0.078	-0.182	0.027	-1.452	0.053719	0.147	0.349		1568	-0.064	-0.273	0.145	-0.603	0.106	0.547	0.681
uncultured	1568	-0.075	-0.178	0.027	-1.442	0.0520111	0.149	0.351		1568	-0.257	-0.488	-0.026	-2.181	0.118	0.029	0.137
Fusobacterium	1568	0.077	-0.03	0.184	1.407	0.0547264	0.16	0.368		1568	0.01	-0.026	0.047	0.551	0.019	0.581	0.701
[Eubacterium] oxidoreducens group	1568	-0.074	-0.177	0.029	-1.403	0.0527441	0.16	0.368		1568	-0.005	-0.123	0.113	-0.174	0.06	0.862	0.915
Christensenella	1568	0.069	-0.034	0.172	1.315	0.0524715	0.188	0.427		1568	0.054	-0.015	0.122	1.534	0.035	0.125	0.299
UCG-003	1568	-0.068	-0.171	0.035	-1.286	0.0528771	0.199	0.444		1568	-0.185	-0.455	0.085	-1.342	0.138	0.18	0.348
Catenibacillus	1568	0.069	-0.038	0.176	1.266	0.0545024	0.206	0.455		1568	0.045	0.01	0.079	2.499	0.018	0.013	0.09
GCA-900066575	1568	0.065	-0.037	0.167	1.251	0.0519584	0.211	0.461		1568	0.071	0.015	0.128	2.487	0.029	0.013	0.09
Harryflintia	1568	0.067	-0.038	0.172	1.242	0.0539452	0.214	0.461		1568	0.031	-0.006	0.069	1.636	0.019	0.102	0.266
Anaerofustis	1568	0.065	-0.038	0.169	1.237	0.0525465	0.216	0.461		1568	0.04	-0.002	0.082	1.861	0.021	0.063	0.221
Dielma	1568	0.065	-0.039	0.168	1.226	0.0530179	0.22	0.461		1568	0.036	-0.05	0.121	0.815	0.044	0.415	0.61
uncultured bacterium	1568	-0.065	-0.168	0.039	-1.223	0.053148	0.221	0.461		1568	-0.029	-0.104	0.047	-0.741	0.039	0.459	0.637
Family XIII AD3011 group	1568	-0.064	-0.168	0.039	-1.218	0.0525452	0.223	0.461		1568	-0.105	-0.237	0.027	-1.558	0.067	0.119	0.295
Marvinbryantia	1568	-0.063	-0.165	0.039	-1.208	0.0521523	0.227	0.464		1568	-0.203	-0.362	-0.045	-2.52	0.081	0.012	0.09
Turicibacter	1568	-0.063	-0.168	0.041	-1.195	0.0527197	0.232	0.469		1568	0.005	-0.046	0.056	0.197	0.026	0.844	0.912
Atopobium	1568	0.063	-0.044	0.171	1.158	0.0544041	0.247	0.489		1568	0.036	-0.002	0.075	1.862	0.02	0.063	0.221
Allisonella	1568	-0.061	-0.165	0.043	-1.152	0.0529514	0.249	0.489		1568	0.02	-0.015	0.056	1.118	0.018	0.264	0.439
Blautia	1568	0.063	-0.045	0.171	1.151	0.054735	0.25	0.489		1568	0.046	-0.078	0.17	0.731	0.063	0.465	0.637
Slackia	1568	0.06	-0.044	0.163	1.133	0.0529568	0.257	0.499		1568	0.034	-0.035	0.103	1.01	0.035	0.313	0.498
[Eubacterium] nodatum group	1568	0.057	-0.045	0.159	1.096	0.0520073	0.273	0.521		1568	0.026	-0.036	0.089	0.822	0.032	0.411	0.61
Rikenellaceae RC9 gut group	1568	0.058	-0.046	0.162	1.089	0.0532599	0.276	0.521		1568	0.034	-0.006	0.074	1.645	0.02	0.1	0.266
Desulfovibrio	1568	-0.058	-0.162	0.047	-1.086	0.053407	0.277	0.521		1568	0.01	-0.038	0.058	0.403	0.024	0.687	0.773
Anaerostipes	1568	0.057	-0.047	0.162	1.075	0.0530233	0.282	0.521		1568	0.132	-0.006	0.271	1.872	0.071	0.061	0.221
uncultured organism	1568	0.057	-0.047	0.162	1.075	0.0530233	0.282	0.521		1568	0.036	-0.001	0.073	1.888	0.019	0.059	0.221
[Ruminococcus] gauvreauii group	1568	-0.054	-0.158	0.05	-1.022	0.0528376	0.307	0.559		1568	-0.169	-0.368	0.031	-1.66	0.102	0.097	0.264
Streptococcus	1568	0.054	-0.05	0.158	1.017	0.0530973	0.309	0.559		1568	0.076	-0.091	0.243	0.891	0.085	0.373	0.575
Shuttleworthia	1568	-0.051	-0.154	0.051	-0.98	0.0520408	0.327	0.586		1568	0.013	-0.046	0.072	0.419	0.03	0.675	0.77
Olsenella	1568	-0.05	-0.154	0.054	-0.939	0.0532481	0.348	0.617		1568	-0.002	-0.046	0.043	-0.067	0.023	0.946	0.962
Oribacterium	1568	0.05	-0.057	0.156	0.915	0.0546448	0.36	0.632		1568	0.012	-0.023	0.046	0.659	0.018	0.51	0.662
Escherichia-Shigella	1568	0.05	-0.058	0.157	0.909	0.0550055	0.363	0.632		1568	0.316	-0.097	0.729	1.501	0.211	0.134	0.303
Klebsiella	1568	0.047	-0.057	0.15	0.887	0.0529876	0.375	0.641		1568	0.054	-0.018	0.126	1.462	0.037	0.144	0.308
uncultured	1568	0.047	-0.056	0.15	0.887	0.0529876	0.375	0.641		1568	0.041	-0.007	0.089	1.675	0.024	0.094	0.26
Diaphorobacter	1568	0.046	-0.06	0.153	0.854	0.0538642	0.393	0.659		1568	0.017	-0.028	0.062	0.727	0.023	0.468	0.637
Moryella	1568	-0.045	-0.148	0.058	-0.852	0.0528169	0.394	0.659		1568	-0.01	-0.066	0.047	-0.332	0.029	0.74	0.818
Lachnospiraceae UCG-010	1568	-0.044	-0.147	0.058	-0.845	0.052071	0.398	0.659		1568	0.018	-0.039	0.075	0.615	0.029	0.538	0.679
uncultured	1568	-0.045	-0.151	0.06	-0.841	0.0535077	0.4	0.659		1568	-0.061	-0.198	0.077	-0.867	0.07	0.386	0.585
Enterococcus	1568	-0.043	-0.146	0.059	-0.832	0.0516827	0.406	0.659		1568	0.01	-0.038	0.058	0.412	0.024	0.681	0.771
Acidaminococcus	1568	0.044	-0.06	0.147	0.83	0.053012	0.406	0.659		1568	0.029	-0.007	0.065	1.595	0.018	0.111	0.282
uncultured	1568	-0.044	-0.148	0.06	-0.822	0.053528	0.411	0.661		1568	0.012	-0.025	0.048	0.633	0.019	0.527	0.676
UCG-005	1568	-0.044	-0.15	0.062	-0.813	0.0541205	0.416	0.662		1568	0.029	-0.169	0.226	0.283	0.101	0.777	0.844
[Eubacterium] hallii group	1568	-0.043	-0.148	0.061	-0.808	0.0532178	0.419	0.662		1568	-0.107	-0.252	0.038	-1.444	0.074	0.149	0.314
uncultured bacterium	1568	-0.04	-0.144	0.065	-0.743	0.0538358	0.458	0.717		1568	0.008	-0.029	0.045	0.42	0.019	0.675	0.77
Family XIII UCG-001	1568	-0.038	-0.141	0.064	-0.733	0.0518417	0.464	0.72		1568	0.016	-0.162	0.194	0.179	0.091	0.858	0.915
Undibacterium	1568	0.038	-0.065	0.141	0.721	0.0527046	0.471	0.726		1568	0.031	-0.013	0.075	1.372	0.023	0.17	0.34
Tyzzerella	1568	0.037	-0.065	0.14	0.714	0.0518207	0.475	0.726		1568	0.023	-0.112	0.158	0.335	0.069	0.738	0.818
uncultured	1568	0.038	-0.067	0.142	0.707	0.0537482	0.48	0.727		1568	0.081	-0.059	0.22	1.136	0.071	0.256	0.43
Lachnospiraceae UCG-008	1568	-0.036	-0.139	0.067	-0.686	0.0524781	0.493	0.741		1568	-0.145	-0.305	0.015	-1.781	0.081	0.075	0.232
Merdibacter	1568	0.034	-0.068	0.137	0.658	0.0516717	0.511	0.751		1568	0.033	-0.022	0.089	1.17	0.028	0.242	0.413
[Eubacterium] siraeum group	1568	-0.035	-0.14	0.07	-0.655	0.0534351	0.512	0.751		1568	-0.158	-0.466	0.15	-1.005	0.157	0.315	0.498
Acetanaerobacterium	1568	0.036	-0.072	0.144	0.652	0.0552147	0.515	0.751		1568	0.018	-0.016	0.052	1.039	0.017	0.299	0.484
Coprobacter	1568	-0.034	-0.138	0.07	-0.646	0.0526316	0.518	0.751		1568	-0.104	-0.353	0.144	-0.824	0.127	0.41	0.61
TM7x	1568	0.034	-0.069	0.137	0.645	0.0527132	0.519	0.751		1568	0.025	-0.039	0.088	0.768	0.032	0.443	0.63
Butyricicoccus	1568	-0.034	-0.139	0.07	-0.639	0.0532081	0.523	0.751		1568	-0.007	-0.147	0.132	-0.105	0.071	0.916	0.955
UCG-007	1568	0.034	-0.072	0.14	0.632	0.0537975	0.527	0.751		1568	0.026	-0.011	0.062	1.394	0.019	0.164	0.334
uncultured organism	1568	0.033	-0.071	0.137	0.62	0.0532258	0.535	0.756		1568	0.029	-0.007	0.066	1.568	0.019	0.117	0.293
Fournierella	1568	0.032	-0.072	0.135	0.601	0.0532446	0.548	0.769		1568	0.065	0.018	0.112	2.71	0.024	0.007	0.08
Enterobacter	1568	-0.032	-0.14	0.075	-0.59	0.0542373	0.555	0.771		1568	-0.034	-0.213	0.145	-0.375	0.091	0.708	0.792
Phascolarctobacterium	1568	-0.031	-0.133	0.072	-0.586	0.052901	0.558	0.771		1568	0.007	-0.504	0.518	0.026	0.261	0.979	0.985
Campylobacter	1568	0.031	-0.074	0.135	0.578	0.0536332	0.563	0.773		1568	0.015	-0.024	0.054	0.734	0.02	0.463	0.637
Adlercreutzia	1568	0.029	-0.074	0.132	0.56	0.0517857	0.575	0.784		1568	0.059	-0.126	0.245	0.625	0.095	0.532	0.676
CHKCI002	1568	0.029	-0.074	0.132	0.547	0.0530165	0.584	0.785		1568	0.021	-0.013	0.054	1.216	0.017	0.224	0.401
Catenibacterium	1568	0.029	-0.076	0.134	0.542	0.0535055	0.588	0.785		1568	0.037	-0.003	0.077	1.82	0.02	0.069	0.224
uncultured bacterium	1568	-0.028	-0.134	0.078	-0.521	0.0537428	0.602	0.785		1568	0.03	-0.004	0.064	1.724	0.017	0.085	0.246
uncultured	1568	-0.027	-0.131	0.076	-0.521	0.0518234	0.602	0.785		1568	0.03	-0.01	0.069	1.478	0.02	0.14	0.306
Pseudoflavonifractor	1568	0.027	-0.075	0.129	0.521	0.0518234	0.603	0.785		1568	0.046	-0.001	0.093	1.934	0.024	0.053	0.205
uncultured bacterium	1568	0.027	-0.076	0.13	0.52	0.0519231	0.603	0.785		1568	0.02	-0.048	0.089	0.579	0.035	0.563	0.692
Gemella	1568	-0.027	-0.131	0.077	-0.512	0.0527344	0.608	0.785		1568	0.015	-0.036	0.066	0.588	0.026	0.557	0.689
Collinsella	1568	-0.027	-0.13	0.077	-0.505	0.0534653	0.614	0.785		1568	-0.074	-0.283	0.134	-0.7	0.106	0.484	0.65
Butyricimonas	1568	0.026	-0.076	0.129	0.505	0.0514851	0.614	0.785		1568	0	-0.344	0.344	0.007	0.175	0.995	0.995
Colidextribacter	1568	-0.026	-0.131	0.08	-0.478	0.0543933	0.633	0.801		1568	-0.04	-0.169	0.09	-0.603	0.066	0.547	0.681
Defluviitaleaceae UCG-011	1568	-0.024	-0.127	0.078	-0.468	0.0512821	0.64	0.801		1568	-0.074	-0.155	0.006	-1.815	0.041	0.07	0.224
uncultured bacterium	1568	-0.025	-0.129	0.08	-0.463	0.0539957	0.643	0.801		1568	-0.072	-0.391	0.247	-0.443	0.163	0.658	0.768
Staphylococcus	1568	0.025	-0.081	0.13	0.457	0.0547046	0.648	0.801		1568	0.016	-0.041	0.073	0.543	0.029	0.587	0.703
Holdemanella	1568	-0.024	-0.127	0.079	-0.457	0.0525164	0.648	0.801		1568	0.024	-0.02	0.068	1.066	0.023	0.287	0.469
Senegalimassilia	1568	-0.024	-0.128	0.08	-0.448	0.0535714	0.654	0.802		1568	-0.016	-0.085	0.052	-0.463	0.035	0.643	0.761
uncultured bacterium	1568	-0.023	-0.126	0.079	-0.444	0.0518018	0.657	0.802		1568	-0.02	-0.497	0.457	-0.082	0.243	0.935	0.955
Fusicatenibacter	1568	-0.023	-0.128	0.081	-0.434	0.0529954	0.664	0.805		1568	0.061	-0.104	0.225	0.721	0.084	0.471	0.637
uncultured	1568	0.023	-0.082	0.127	0.427	0.0538642	0.669	0.805		1568	0.054	-0.036	0.144	1.176	0.046	0.24	0.413
Ruminococcus sp. Marseille-P2976	1568	0.022	-0.081	0.126	0.423	0.0520095	0.673	0.805		1568	0.047	-0.032	0.126	1.166	0.04	0.244	0.413
uncultured	1568	0.02	-0.084	0.124	0.375	0.0533333	0.708	0.841		1568	0.165	0.015	0.315	2.164	0.076	0.031	0.137
metagenome	1568	-0.019	-0.122	0.083	-0.371	0.0512129	0.711	0.841		1568	0.02	-0.039	0.078	0.658	0.03	0.51	0.662
Flavobacterium	1568	-0.019	-0.123	0.086	-0.351	0.0541311	0.725	0.847		1568	0.018	-0.029	0.064	0.749	0.024	0.454	0.637
Lachnospiraceae NC2004 group	1568	0.018	-0.085	0.122	0.351	0.0512821	0.726	0.847		1568	0.044	-0.021	0.11	1.324	0.033	0.186	0.353
Enterorhabdus	1568	-0.018	-0.123	0.086	-0.341	0.0527859	0.733	0.851		1568	0.025	-0.048	0.099	0.673	0.037	0.501	0.658
Monoglobus	1568	0.017	-0.087	0.12	0.314	0.0541401	0.753	0.869		1568	0.062	-0.079	0.203	0.867	0.072	0.386	0.585
uncultured	1568	0.017	-0.091	0.124	0.303	0.0561056	0.762	0.873		1568	0.025	-0.084	0.134	0.45	0.056	0.652	0.767
Parabacteroides	1568	-0.015	-0.118	0.089	-0.279	0.0537634	0.78	0.88		1568	0.044	-0.081	0.17	0.685	0.064	0.493	0.653
Alistipes	1568	0.015	-0.091	0.12	0.274	0.0547445	0.784	0.88		1568	0.075	-0.069	0.218	1.024	0.073	0.306	0.492
Lachnospiraceae UCG-004	1568	-0.015	-0.119	0.09	-0.274	0.0547445	0.784	0.88		1568	-0.07	-0.216	0.077	-0.931	0.075	0.352	0.551
Leuconostoc	1568	-0.014	-0.119	0.09	-0.265	0.0528302	0.791	0.88		1568	0.03	-0.012	0.072	1.386	0.022	0.166	0.336
gut metagenome	1568	-0.014	-0.117	0.089	-0.263	0.0532319	0.793	0.88		1568	-0.017	-0.075	0.042	-0.558	0.03	0.577	0.7
Negativibacillus	1568	0.013	-0.09	0.117	0.254	0.0511811	0.8	0.88		1568	0.019	-0.027	0.065	0.799	0.024	0.424	0.618
Psychrobacter	1568	0.014	-0.092	0.119	0.252	0.0555556	0.801	0.88		1568	0.027	-0.008	0.062	1.517	0.018	0.129	0.3
Acinetobacter	1568	-0.012	-0.115	0.09	-0.232	0.0517241	0.816	0.892		1568	0.024	-0.015	0.063	1.205	0.02	0.228	0.401
Howardella	1568	0.012	-0.093	0.117	0.225	0.0533333	0.822	0.893		1568	0.015	-0.023	0.052	0.774	0.019	0.439	0.63
Porphyromonas	1568	0.01	-0.094	0.115	0.194	0.0515464	0.846	0.914		1568	0.023	-0.032	0.078	0.818	0.028	0.413	0.61
Oscillospira	1568	0.009	-0.094	0.113	0.181	0.0497238	0.857	0.915		1568	-0.023	-0.179	0.133	-0.293	0.08	0.77	0.841
Bifidobacterium	1568	0.01	-0.095	0.114	0.18	0.0555556	0.857	0.915		1568	-0.037	-0.151	0.078	-0.63	0.058	0.529	0.676
Bilophila	1568	-0.009	-0.111	0.094	-0.163	0.0552147	0.871	0.924		1568	0.005	-0.242	0.252	0.037	0.126	0.97	0.981
Dialister	1568	-0.008	-0.111	0.095	-0.158	0.0506329	0.874	0.924		1568	-0.08	-0.576	0.416	-0.315	0.253	0.753	0.828
uncultured	1568	0.007	-0.096	0.111	0.133	0.0526316	0.894	0.936		1568	0.036	-0.012	0.083	1.477	0.024	0.14	0.306
Peptococcus	1568	-0.007	-0.11	0.097	-0.127	0.0551181	0.899	0.936		1568	0.031	-0.014	0.077	1.347	0.023	0.178	0.348
Oxalobacter	1568	-0.006	-0.109	0.096	-0.124	0.0483871	0.901	0.936		1568	0.052	-0.015	0.119	1.529	0.034	0.127	0.299
uncultured	1568	0.006	-0.097	0.109	0.118	0.0508475	0.906	0.936		1568	-0.011	-0.166	0.145	-0.137	0.079	0.891	0.935
UC5-1-2E3	1568	0.005	-0.096	0.107	0.099	0.0505051	0.921	0.941		1568	-0.004	-0.087	0.08	-0.083	0.043	0.934	0.955
Sutterella	1568	-0.005	-0.107	0.098	-0.09	0.0555556	0.928	0.941		1568	-0.067	-0.38	0.246	-0.42	0.16	0.674	0.77
Pseudomonas	1568	-0.005	-0.107	0.098	-0.087	0.0574713	0.931	0.941		1568	0.026	-0.013	0.065	1.293	0.02	0.196	0.365
DTU089	1568	0.005	-0.099	0.109	0.086	0.0581395	0.931	0.941		1568	0.009	-0.173	0.191	0.101	0.093	0.92	0.955
Holdemania	1568	-0.004	-0.106	0.098	-0.07	0.0571429	0.944	0.949		1568	0.032	-0.112	0.176	0.434	0.074	0.664	0.77
[Eubacterium] eligens group	1568	-0.002	-0.106	0.102	-0.036	0.0555556	0.971	0.971		1568	-0.008	-0.219	0.203	-0.088	0.107	0.93	0.955

## Sheet: eTable 6 MIND-Set case-control
	eTable 6. Overview of the associations between MDD diagnosis (case-control) and genus abundace. The presented statistics are derived from a logistic (left) and quantile (right) regression in the MIND-Set cohort
		Logistic regression All models were adjusted for age, gender, BMI, and sequencing depth.									Quantile regression All models were adjusted for age, gender, BMI, and sequencing depth.
	Genus	n	Log OR	Lower CI	Upper CI	z	se	p	padj		n	Effect size	Lower CI	Upper CI	t	se	p	padj
	Anaerotruncus	234	0.25	-0.056	0.555	1.599	0.156348	0.11	0.196		234	0.412	0.062	0.762	2.317	0.178	0.021	0.064
	Clostridium innocuum group	234	0.246	-0.073	0.565	1.512	0.162698	0.131	0.196		234	0.648	-0.238	1.534	1.442	0.449	0.151	0.271
	Clostridium sensu stricto 1	234	-0.262	-0.581	0.057	-1.611	0.162632	0.107	0.196		234	-0.693	-1.328	-0.057	-2.148	0.323	0.033	0.074
	Eggerthella	234	0.07	-0.236	0.376	0.451	0.155211	0.652	0.652		234	0.29	-0.675	1.256	0.592	0.49	0.554	0.623
	Faecalitalea	234	0.122	-0.192	0.435	0.76	0.160526	0.447	0.503		234	0.08	-0.46	0.621	0.293	0.274	0.769	0.769
	GCA900066755	234	0.224	-0.083	0.531	1.428	0.156863	0.153	0.197		234	0.319	-0.202	0.84	1.205	0.265	0.229	0.344
	Hungatella	234	0.421	0.094	0.747	2.525	0.166733	0.012	0.091		234	2.119	1.409	2.829	5.882	0.36	< 0.001	< 0.001
	Intestinimonas	234	0.366	0.057	0.675	2.32	0.157759	0.02	0.091		234	0.153	-0.123	0.428	1.092	0.14	0.2761	0.355
	Lachnospiraceae FCS020 group	234	-0.424	-0.82	-0.028	-2.097	0.202194	0.036	0.108		234	-0.272	-0.503	-0.041	-2.319	0.117	0.0213	0.0642

## Sheet: eTable 7 Medication statistics
	eTable 7. Overview of the associations between SSRI/SNRI treatment (yes/no) and genus abundance in the 9 MDD-associated genera. The presented statistics are derived from a logistic (left) and quantile (right) regression in the MACS (top) an MIND-Set (bottom) cohorts
	MACS
	Genus	Logistic regression All models were adjusted for age, gender, BMI, anxiety comorbidity, collection site, sequencing depth, sequencing batch, and BDI.									Quantile regression All models were adjusted for age, gender, BMI, anxiety comorbidity, collection site, sequencing depth, sequencing batch, and BDI.
		n	Log OR	Lower CI	Upper CI	z	se	p	padj		n	Effect size	Lower CI	Upper CI	t	se	p	padj
	Anaerotruncus	656	0.213	0.046	0.381	2.493	0.0854392	0.013	0.057		657	0.133	-0.016	0.282	1.75	0.076	0.081	0.316
	Clostridium innocuum group	656	0.101	-0.068	0.269	1.17	0.0863248	0.242	0.436		657	0.095	-0.038	0.228	1.4	0.068	0.162	0.364
	Clostridium sensu stricto 1	656	-0.308	-0.475	-0.141	-3.611	0.0852949	< 0.001	0.003		657	-0.666	-1.102	-0.229	-2.995	0.222	0.003	0.026
	Eggerthella	656	0.055	-0.112	0.221	0.644	0.0854037	0.52	0.617		657	0.148	-0.205	0.501	0.825	0.18	0.41	0.41
	Faecalitalea	656	0.013	-0.153	0.179	0.154	0.0844156	0.877	0.877		657	0.048	-0.035	0.131	1.136	0.042	0.256	0.379
	GCA900066755	656	-0.052	-0.222	0.118	-0.6	0.0866667	0.549	0.617		657	-0.035	-0.088	0.019	-1.258	0.027	0.209	0.376
	Hungatella	656	0.108	-0.061	0.276	1.25	0.0864	0.211	0.436		657	0.071	-0.015	0.157	1.622	0.044	0.105	0.316
	Intestinimonas	656	0.123	-0.05	0.296	1.396	0.0881089	0.163	0.436		657	0.179	-0.156	0.515	1.049	0.171	0.295	0.379
	Lachnospiraceae FCS020 group	656	-0.061	-0.225	0.104	-0.72	0.0847222	0.472	0.617		657	-0.103	-0.328	0.123	-0.893	0.115	0.372	0.41
	MINDSet
	Genus	Logistic regression All models were adjusted for age, gender, BMI, sequencing depth, IDS, and # psy. Comorbidity.									Quantile regression All models were adjusted for age, gender, BMI, sequencing depth, IDS, and # psy. Comorbidity.
		n	Log OR	Lower CI	Upper CI	z	se	p	padj		n	Effect size	Lower CI	Upper CI	t	se	p	padj
	Anaerotruncus	121	0.518	0.004	1.031	1.976	0.262146	0.048	0.17		121	0.386	-0.19	0.962	1.329	0.291	0.187	0.336
	Clostridium innocuum group	121	0.121	-0.324	0.567	0.534	0.226592	0.593	0.593		121	0.719	-0.713	2.151	0.994	0.723	0.322	0.381
	Clostridium sensu stricto 1	121	-0.475	-0.963	0.014	-1.905	0.249344	0.057	0.17		121	-1.193	-2.017	-0.369	-2.869	0.416	0.005	0.044
	Eggerthella	121	0.389	-0.065	0.843	1.679	0.231686	0.093	0.21		121	2.288	0.4	4.176	2.4	0.953	0.018	0.054
	Faecalitalea	121	0.356	-0.104	0.816	1.519	0.234365	0.129	0.219		121	1.497	-0.155	3.149	1.795	0.834	0.075	0.169
	GCA900066755	121	0.535	0.045	1.024	2.142	0.249767	0.032	0.17		121	1.173	0.204	2.142	2.398	0.489	0.018	0.054
	Hungatella	121	0.144	-0.322	0.611	0.607	0.237232	0.544	0.593		121	0.313	-0.743	1.369	0.587	0.533	0.558	0.558
	Intestinimonas	121	0.386	-0.134	0.907	1.454	0.265475	0.146	0.219		121	0.234	-0.227	0.695	1.006	0.233	0.317	0.381
	Lachnospiraceae FCS020 group	121	-0.135	-0.571	0.301	-0.607	0.222405	0.544	0.593		121	-0.285	-0.872	0.302	-0.961	0.296	0.339	0.381

## Sheet: eTable 8 Meta-analysis 
eTable 8. Overview of the pooled effect sizes from the random-effects meta-analysis on the associations between SSRI/SNRI treatment (yes/no) and genus abundance in the MACS and MIND-Set cohorts
Genus	Logistic regression
	Pooled effect size	Lower CI	Upper CI	se	p	padj	I2	p (I2)	Log OR MACS	MACS Weight (in %)	Log OR MIND-Set	MIND-Set Weight (in %)
Anaerotruncus	0.264868	0.0413091	0.488426	0.114063	0.0202262	0.0910177	1.21908	0.269541	0.213	83.0999	0.518	16.9001
Clostridium innocuum group	0.103215	-0.0544735	0.260903	0.0804546	0.19953	0.359154	0.00723406	0.932219	0.101	87.4633	0.121	12.5367
Clostridium sensu stricto 1	-0.325075	-0.483059	-0.167091	0.0806057	< 0.001	< 0.001	0.402112	0.526	-0.308	89.5305	-0.475	10.4695
Eggerthella	0.152261	-0.145372	0.449895	0.151857	0.316023	0.474034	1.83337	0.17573	0.055	70.3163	0.389	29.6837
Faecalitalea	0.114945	-0.192377	0.422267	0.1568	0.463517	0.501481	1.89275	0.168892	0.013	70.3163	0.356	29.6837
GCA900066755	0.194626	-0.372885	0.762137	0.289552	0.501481	0.501481	4.92872	0.0264139	-0.052	57.9649	0.535	42.0351
Hungatella	0.111899	-0.0467899	0.270588	0.0809652	0.166952	0.359154	0.0211644	0.884332	0.108	88.4344	0.144	11.5656
Intestinimonas	0.149133	-0.0148294	0.313096	0.0836559	0.0746357	0.223907	0.884477	0.346979	0.123	90.0751	0.386	9.92493
Lachnospiraceae FCS020 group	-0.0698323	-0.223994	0.0843291	0.0786553	0.374633	0.481671	0.0980778	0.754149	-0.061	87.5019	-0.135	12.4981
Genus	Quantile regression
	Pooled effect size	Lower CI	Upper CI	se	p	padj	I2	p (I2)	Effect Size MACS	MACS Weight (in %)	Effect Size MIND-Set	MIND-Set Weight (in %)
Anaerotruncus	0.149033	0.00509316	0.292972	0.0734398	0.0424262	0.190918	0.710712	0.399208	0.129	93.61	0.386	6.39
Clostridium innocuum group	0.100487	-0.0319781	0.232953	0.0675856	0.137064	0.2693	0.738097	0.390271	0.097	99.13	0.719	0.87
Clostridium sensu stricto 1	-0.812391	-1.2759	-0.34888	0.236489	0.000592093	0.00532884	1.25257	0.263062	-0.692	72.18	-1.193	27.82
Eggerthella	1.01337	-1.04488	3.07162	1.05015	0.334555	0.430143	4.86702	0.0273748	0.139	59.57	2.288	40.43
Faecalitalea	0.533121	-0.806932	1.87317	0.683713	0.435542	0.435542	3.01104	0.0826993	0.051	66.52	1.497	33.48
GCA900066755	0.470395	-0.696831	1.63762	0.595534	0.429603	0.435542	6.07437	0.0137157	0.072	58.18	1.173	41.82
Hungatella	0.0724945	-0.0128672	0.157856	0.0435527	0.0960079	0.2693	0.204805	0.65087	0.16	99.33	0.313	0.67
Intestinimonas	0.198432	-0.0714811	0.468345	0.137713	0.149611	0.2693	0.0361428	0.849221	-0.105	64.97	0.234	35.03
Lachnospiraceae FCS020 group	-0.126404	-0.33641	0.0836018	0.107148	0.238113	0.357169	0.328051	0.566809	-0.105	86.92	-0.285	13.08

## Sheet: eTable 9 SSRI SNRI specificity
eTable 9. Sub-group analyses in SSRI/SNRI-only and other psychotropic-only groups showing specificity of the associations to the MDD groups treated with SSRI/SNRIs
MACS
Logistic Regression										Quantile Regression
Only SSRIs and/or SNRIs vs unmedicated MDD										Only SSRIs and/or SNRIs vs unmedicated MDD
Genus	n	Log OR	Lower CI	Upper CI	z	se	p	padj		Effect size	Lower CI	Upper CI	t	se	p	padj
Anaerotruncus	481	0.205	0.012	0.398	2.087	0.0982271	0.037	0.166		0.085	-0.085	0.255	0.985	0.087	0.325	0.673
Clostridium innocuum group	481	0.053	-0.139	0.245	0.542	0.097786	0.588	0.661		0.017	-0.148	0.182	0.205	0.084	0.838	0.931
Clostridium sensu stricto 1	481	-0.274	-0.473	-0.075	-2.696	0.101632	0.007	0.063		-0.836	-1.392	-0.279	-2.95	0.283	0.003	0.03
Eggerthella	481	0.136	-0.059	0.331	1.37	0.0992701	0.171	0.431		0.17	-0.354	0.695	0.638	0.267	0.524	0.673
Faecalitalea	481	-0.031	-0.223	0.161	-0.313	0.0990415	0.754	0.754		-0.036	-0.126	0.055	-0.776	0.046	0.438	0.673
GCA900066755	481	-0.113	-0.32	0.095	-1.064	0.106203	0.287	0.431		-0.052	-0.106	0.001	-1.925	0.027	0.055	0.247
Hungatella	481	0.114	-0.081	0.309	1.148	0.0993031	0.251	0.431		0.004	-0.092	0.1	0.087	0.049	0.931	0.931
Intestinimonas	481	0.126	-0.077	0.33	1.218	0.103448	0.223	0.431		0.139	-0.25	0.527	0.701	0.198	0.483	0.673
Lachnospiraceae FCS020 group	481	0.069	-0.127	0.266	0.693	0.0995671	0.488	0.627		0.145	-0.109	0.398	1.122	0.129	0.263	0.673
Only other psychotropic medication vs. unmedicated MDD										Only other psychotropic medication vs. unmedicated MDD
Genus	n	Log OR	Lower CI	Upper CI	z	se	p	padj		Effect size	Lower CI	Upper CI	t	se	p	padj
Anaerotruncus	405	0.044	-0.199	0.286	0.352	0.125	0.725	0.816		0.055	-0.097	0.207	0.712	0.077	0.477	0.951
Clostridium innocuum group	405	0.045	-0.193	0.282	0.369	0.121951	0.712	0.816		-0.043	-0.232	0.145	-0.454	0.096	0.65	0.951
Clostridium sensu stricto 1	405	0.128	-0.107	0.363	1.065	0.120188	0.287	0.563		0.01	-0.643	0.663	0.031	0.332	0.975	0.975
Eggerthella	405	0.128	-0.115	0.371	1.035	0.123671	0.301	0.563		0.081	-0.501	0.664	0.275	0.296	0.783	0.951
Faecalitalea	405	0.135	-0.096	0.366	1.144	0.118007	0.253	0.563		0.031	-0.11	0.173	0.433	0.072	0.665	0.951
GCA900066755	405	-0.133	-0.392	0.126	-1.009	0.131814	0.313	0.563		-0.044	-0.122	0.034	-1.115	0.04	0.265	0.951
Hungatella	405	-0.194	-0.48	0.092	-1.331	0.145755	0.183	0.563		0.041	-0.069	0.151	0.754	0.056	0.451	0.951
Intestinimonas	405	-0.016	-0.269	0.237	-0.122	0.131148	0.903	0.903		-0.376	-0.876	0.125	-1.476	0.255	0.141	0.951
Lachnospiraceae FCS020 group	405	-0.083	-0.331	0.165	-0.655	0.126718	0.513	0.769		-0.039	-0.431	0.353	-0.195	0.199	0.845	0.951
MIND-Set
Logistic Regression										Quantile Regression
Only SSRIs and/or SNRIs										Only SSRIs and/or SNRIs
Genus	n	Log OR	Lower CI	Upper CI	z	se	p	padj		Effect size	Lower CI	Upper CI	t	se	p	padj
Anaerotruncus	107	0.453	-0.127	1.032	1.53	0.296078	0.126	0.284		0.162	-0.375	0.7	0.599	0.271	0.55	0.769
Clostridium innocuum group	107	0.006	-0.489	0.5	0.023	0.26087	0.981	0.981		0.388	-0.749	1.524	0.677	0.573	0.5	0.769
Clostridium sensu stricto 1	107	-0.457	-1	0.085	-1.653	0.276467	0.098	0.284		-1.064	-2.067	-0.061	-2.105	0.505	0.038	0.085
Eggerthella	107	0.336	-0.181	0.852	1.273	0.263943	0.203	0.365		2.534	0.346	4.721	2.298	1.102	0.024	0.071
Faecalitalea	107	0.46	-0.087	1.007	1.648	0.279126	0.099	0.284		2.506	0.797	4.214	2.91	0.861	0.004	0.04
GCA900066755	107	0.664	0.092	1.236	2.275	0.291868	0.023	0.206		1.341	0.228	2.454	2.39	0.561	0.019	0.071
Hungatella	107	0.128	-0.406	0.662	0.47	0.27234	0.639	0.821		0.385	-1.288	2.059	0.457	0.843	0.649	0.769
Intestinimonas	107	0.221	-0.366	0.808	0.738	0.299458	0.46	0.69		0.017	-0.582	0.616	0.057	0.302	0.955	0.955
Lachnospiraceae FCS020 group	107	-0.024	-0.516	0.468	-0.095	0.252632	0.924	0.981		-0.118	-0.692	0.455	-0.409	0.289	0.683	0.769
Only other psychotropic medication										Only other psychotropic medication
Genus	n	Log OR	Lower CI	Upper CI	z	se	p	padj		Effect size	Lower CI	Upper CI	t	se	p	padj
Anaerotruncus	125	0.219	-0.198	0.637	1.031	0.212415	0.303	0.545		0.528	0.035	1.022	2.12	0.249	0.036	0.162
Clostridium innocuum group	125	0.277	-0.136	0.69	1.315	0.210646	0.188	0.453		0.581	-0.083	1.244	1.734	0.335	0.086	0.257
Clostridium sensu stricto 1	125	0.276	-0.147	0.699	1.278	0.215962	0.201	0.453		0.15	-0.712	1.011	0.344	0.435	0.731	0.884
Eggerthella	125	0.384	-0.033	0.801	1.806	0.212625	0.071	0.319		0.697	-0.842	2.236	0.897	0.777	0.371	0.836
Faecalitalea	125	0.092	-0.298	0.481	0.461	0.199566	0.645	0.963		0.088	-0.914	1.089	0.174	0.506	0.863	0.884
GCA900066755	125	0.403	-0.01	0.815	1.914	0.210554	0.056	0.319		0.902	0.125	1.679	2.3	0.392	0.023	0.162
Hungatella	125	0	-0.421	0.422	0.001	0	0.999	0.999		0.075	-0.937	1.086	0.146	0.511	0.884	0.884
Intestinimonas	125	-0.018	-0.44	0.404	-0.083	0.216867	0.934	0.999		0.143	-0.268	0.554	0.689	0.208	0.492	0.884
Lachnospiraceae FCS020 group	125	-0.069	-0.494	0.355	-0.32	0.215625	0.749	0.963		-0.095	-0.466	0.276	-0.505	0.187	0.614	0.884

## Sheet: eTable 10 Comparison to control
	eTable 10. Sub-group analyses comparing the unmedicated and SSRI/SNRI-treated MDD groups to unaffected controls.
	MACS
		Logistic regression Models were adjusted for age, gender, BMI, psychiatric comorbidity, collection site, sequencing depth, sequencing batch, and BDI score.																Quantile regression All models were adjusted for age, gender, BMI, psychiatric comorbidity, collection site, sequencing depth, sequencing batch, and BDI score.
	Genus	Unmedicated vs Medicated					Unaffected vs Unmedicated					Unaffected vs Medicated						Unmedicated vs Medicated					Unaffected vs Unmedicated					Unaffected vs Medicated
		n	Log OR	p	padj		n	Effect Size	p	padj		n	Effect Size	p	padj			n	Effect Size	p	padj		n	Effect Size	p	padj		n	Effect Size	p	padj
	Anaerotruncus	656	0.213	0.013	0.057		1115	0.149	0.025	0.037		1163	0.325	< .001	< 0.001			656	0.133	0.081	0.316		1115	0.081	0.198	0.223		1163	0.214	0.001	0.002
	Clostridium innocuum group	656	0.101	0.242	0.436		1115	0.198	0.003	0.006		1163	0.265	< .001	< 0.001			656	0.095	0.162	0.364		1115	0.115	0.014	0.036		1163	0.16	0.019	0.025
	Clostridium sensu stricto 1	656	-0.308	< .001	0.003		1115	-0.119	0.089	0.1		1163	-0.419	< .001	< 0.001			656	-0.666	0.003	0.026		1115	-0.207	0.239	0.239		1163	-0.908	< .001	< 0.001
	Eggerthella	656	0.055	0.52	0.617		1115	0.219	0.001	0.005		1163	0.247	0	0			656	0.148	0.41	0.41		1115	0.282	0.023	0.041		1163	0.278	0.124	0.124
	Faecalitalea	656	0.013	0.877	0.877		1115	0.12	0.066	0.084		1163	0.19	0.003	0.003			656	0.048	0.256	0.379		1115	0.058	0.016	0.036		1163	0.084	0.014	0.02
	GCA900066755	656	-0.052	0.549	0.617		1115	0.21	0.002	0.006		1163	0.155	0.021	0.021			656	-0.035	0.209	0.376		1115	0.075	0.001	0.005		1163	0.055	0.031	0.035
	Hungatella	656	0.108	0.211	0.436		1115	0.234	< .001	0.003		1163	0.299	< .001	< 0.001			656	0.071	0.105	0.316		1115	0.09	0.005	0.022		1163	0.126	0.005	0.009
	Intestinimonas	656	0.123	0.163	0.436		1115	0.094	0.176	0.176		1163	0.232	0.001	0.001			656	0.179	0.295	0.379		1115	0.264	0.033	0.043		1163	0.521	< .001	< 0.001
	Lachnospiraceae FCS020 group	656	-0.061	0.472	0.617		1115	-0.182	0.009	0.017		1163	-0.259	< .001	< 0.001			656	-0.103	0.372	0.41		1115	-0.185	0.027	0.041		1163	-0.299	0.003	0.007
	MINDSet
		Logistic regression All models were adjusted for age, gender, BMI, sequencing depth, and IDS score. Only unmedicated vs medicated comparisons were further adjusted for # psy. comorbidity.																Quantile regression All models were adjusted for age, gender, BMI, sequencing depth, and IDS score. Only unmedicated vs medicated comparisons were further adjusted for # psy. comorbidity.
	Genus	Unmedicated vs Medicated					Unaffected vs Unmedicated					Unaffected vs Medicated						Unmedicated vs Medicated					Unaffected vs Unmedicated					Unaffected vs Medicated
		n	Log OR	p	padj		n	Effect Size	p	padj		n	Effect Size	p	padj			n	Effect Size	p	padj		n	Effect Size	p	padj		n	Effect Size	p	padj
	Anaerotruncus	121	0.518	0.048	0.17		146	0.069	0.693	0.877		109	0.718	0.015	0.023			121	0.386	0.187	0.336		146	0.02	0.919	0.919		109	0.655	0.065	0.073
	Clostridium innocuum group	121	0.121	0.593	0.593		146	0.022	0.9	0.9		109	0.502	0.054	0.057			121	0.719	0.322	0.381		146	0.146	0.772	0.919		109	1.423	0.044	0.066
	Clostridium sensu stricto 1	121	-0.475	0.057	0.17		146	-0.199	0.262	0.59		109	-0.953	0.002	0.018			121	-1.193	0.005	0.044		146	-0.283	0.409	0.919		109	-1.394	0.008	0.03
	Eggerthella	121	0.389	0.093	0.21		146	-0.163	0.36	0.649		109	0.496	0.057	0.057			121	2.288	0.018	0.054		146	-0.306	0.621	0.919		109	1.756	0.042	0.066
	Faecalitalea	121	0.356	0.129	0.219		146	-0.049	0.78	0.877		109	0.484	0.057	0.057			121	1.497	0.075	0.169		146	0.058	0.84	0.919		109	2.123	0.01	0.03
	GCA900066755	121	0.535	0.032	0.17		146	-0.049	0.779	0.877		109	0.692	0.012	0.021			121	1.173	0.018	0.054		146	-0.04	0.83	0.919		109	1.048	0.032	0.066
	Hungatella	121	0.144	0.544	0.593		146	0.232	0.185	0.556		109	0.771	0.004	0.018			121	0.313	0.558	0.558		146	0.981	0.046	0.41		109	2.276	< .001	< 0.001
	Intestinimonas	121	0.386	0.146	0.219		146	0.328	0.07	0.444		109	0.844	0.01	0.021			121	0.234	0.317	0.381		146	0.028	0.886	0.919		109	0.513	0.057	0.073
	Lachnospiraceae FCS020 group	121	-0.135	0.544	0.593		146	-0.317	0.099	0.444		109	-0.753	0.012	0.021			121	-0.285	0.339	0.381		146	-0.136	0.413	0.919		109	-0.382	0.202	0.202

[truncated: 1 more sheets: eTable 11 Sensitivity analyses]
